# Supplementary material for: Tubular J-aggregates of a new thiacarbocyanine Cy5 dye for the far-red spectral region – a spectroscopic and cryo-transmission electron microscopy study
Source: Royal Society of Chemistry journal article supplement (doi:10.1039/c8cp03378a), 2018-01-01
Supplement: c8cp03378a1.pdf [file c8cp03378a1.pdf]

**ELECTRONIC SUPPLEMENTARY INFORMATION**

**Tubular J-Aggregates of a New Thiocarbocyanine  
Cy5 Dye for the Far-red Spectral Region –  
A Spectroscopic and Cryo-Transmission Electron  
Microscopy Study**

Hans v. Berlepsch\* and Christoph Böttcher

\*Forschungszentrum für Elektronenmikroskopie, Institut für Chemie und Biochemie,  
Freie Universität Berlin, Fabeckstraße 36a, D-14195 Berlin, Germany  
E-Mail: [h.v.berlepsch@fzem.fu-berlin.de](mailto:h.v.berlepsch@fzem.fu-berlin.de)

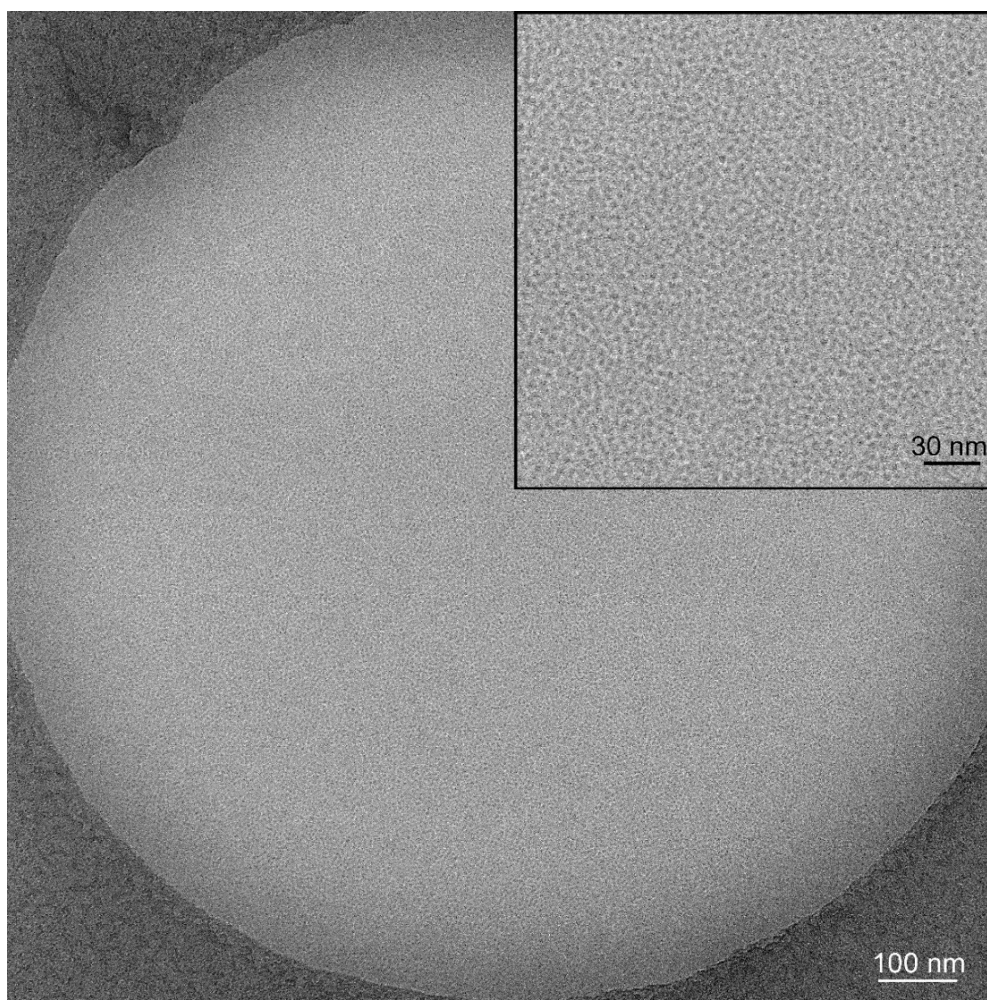

**Fig. S1** Cryo-TEM image of a 3-days-old 0.84 mM dye solution in water showing the typical H-aggregate absorption spectrum. Solely monodisperse, spot-like particles of  $\sim 2.6$  nm diameter may be seen. The inset shows the aggregates at larger magnification.

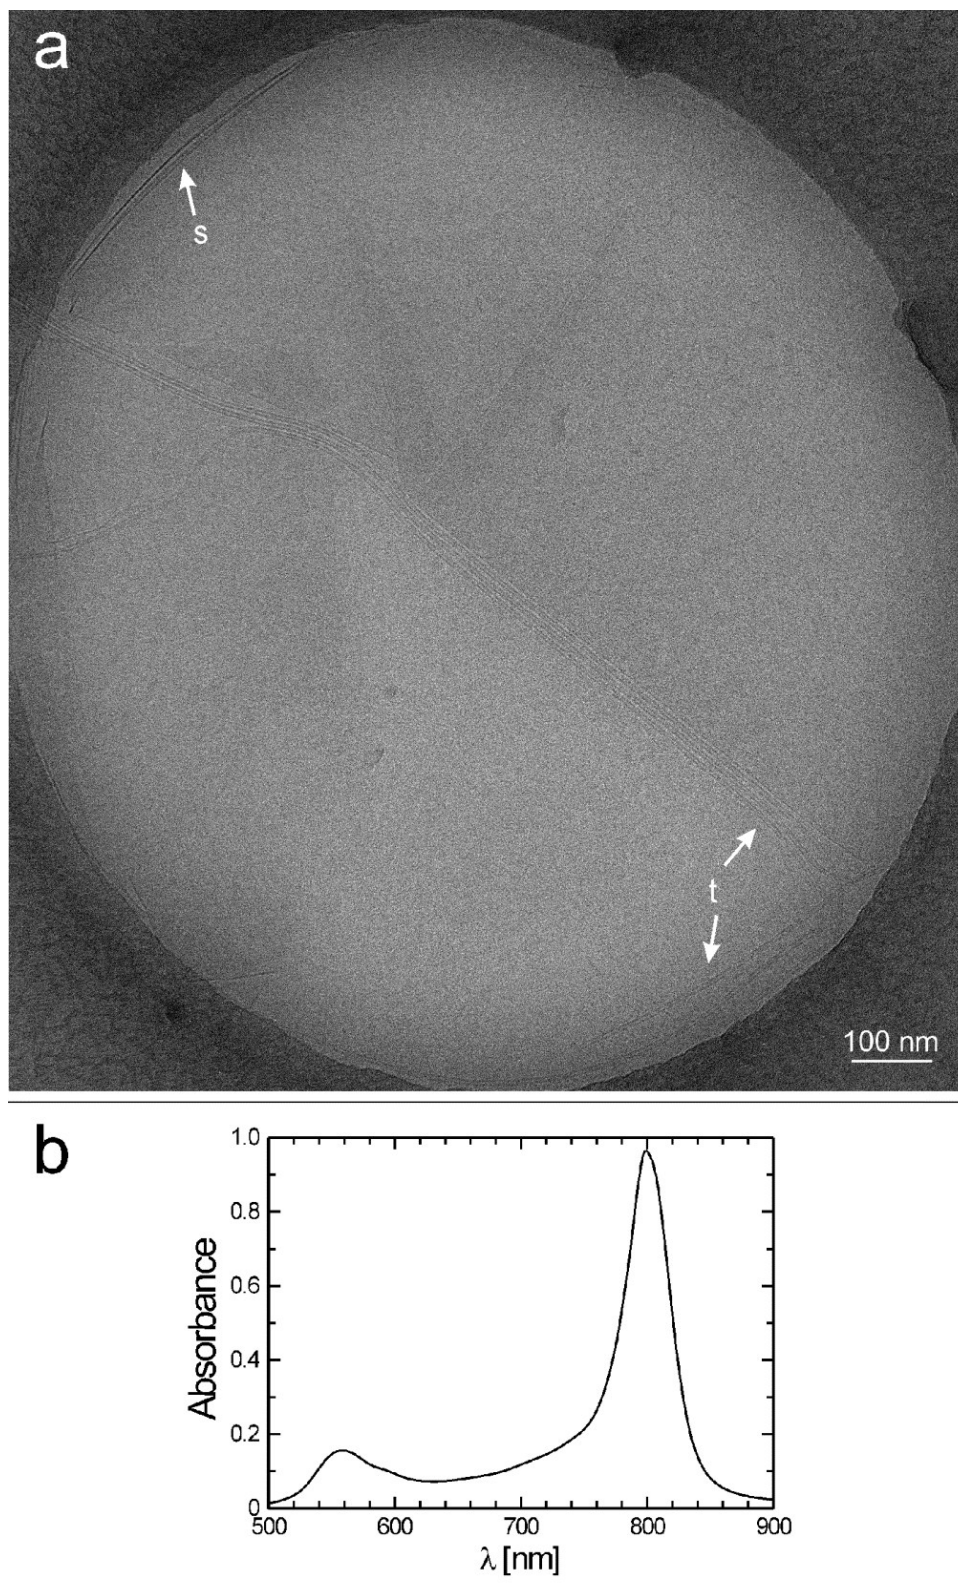

**Fig. S2** Cryo-TEM image (a) and absorption spectrum (b) of a 0.55 mM S2284 solution aggregated in water containing 15 mM NaCl one day after preparation. The J-band is still unstructured and broad, indicating the predominance of intermediate J-aggregates. The micrograph reveals sheet-like (s), mono-layered aggregates and nanotubes (t), whereby the aggregates with sheet-like architecture dominate. The sheets often reveal dark lines, which emerge from folds and provide direct quantitative access to their mono-layered cross-section.

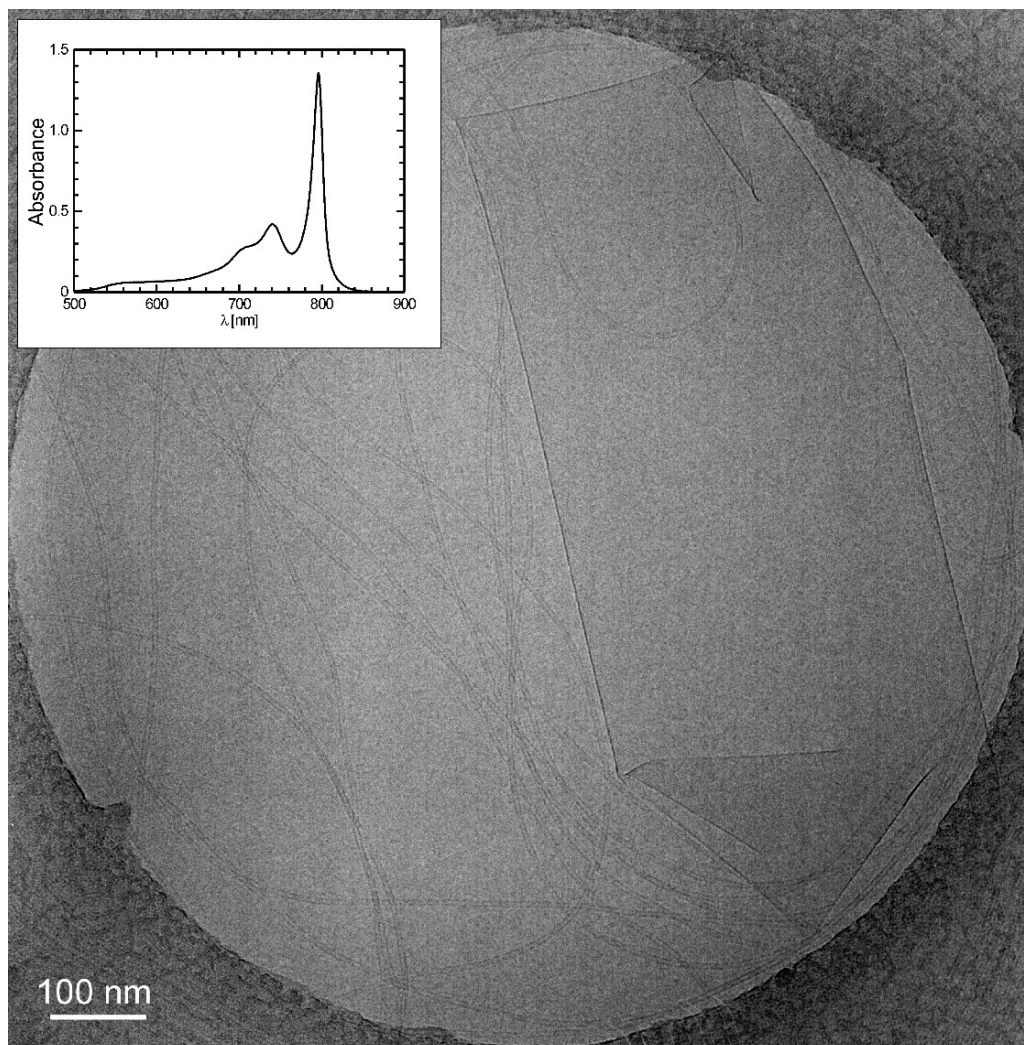

**Fig. S3** Cryo-TEM image of a 0.25 mM dye solution aggregated in water containing 30 mM NaCl after storage for 5 months. A number of nanotubes and one large sheet-like aggregate are visible. The inset displays the absorption spectrum of the investigated solution. Typical for that sample preparation is the overwhelming predominance of nanotubes. Only this micrograph of a total of 36 taken from the sample showed a sheet-like aggregate in addition to the nanotubes.

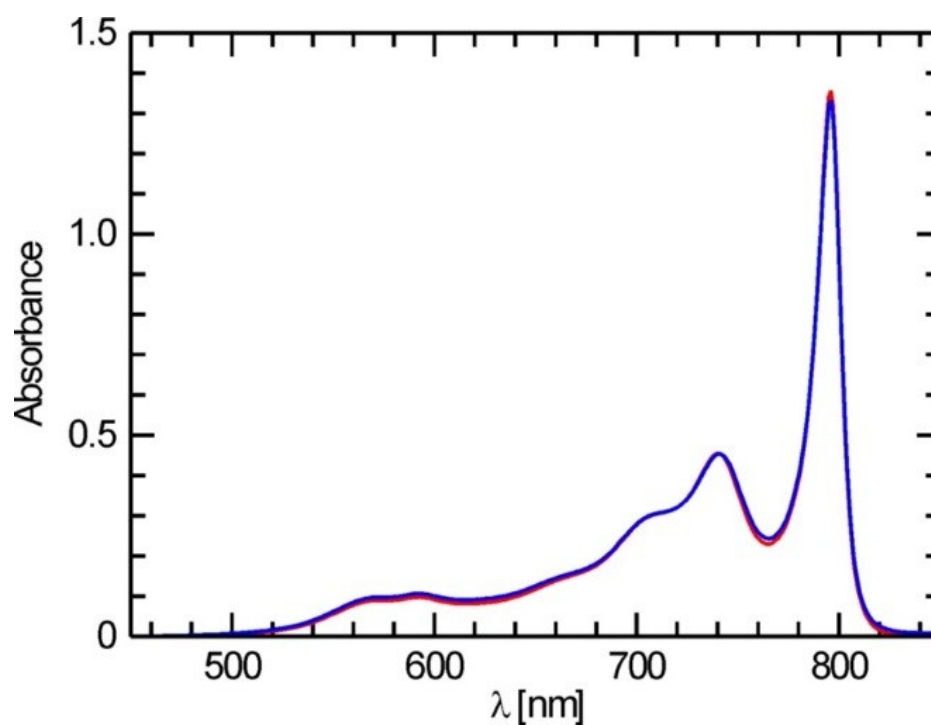

**Fig. S4** Long-term stability of tubular J-aggregates. A 0.3 mM dye solution was prepared in 50 mM NaCl. After aggregation the sample was diluted 6-fold up to 50  $\mu$ M. The absorbance remained stable for at least 3 days. Optical path length:  $L = 1$  mm. (blue line): immediately after dilution; (red line): 3 days after dilution.
